# Supplementary material
Source: Research Square preprint supplement (doi:10.21203/rs.3.rs-9169805/v1)

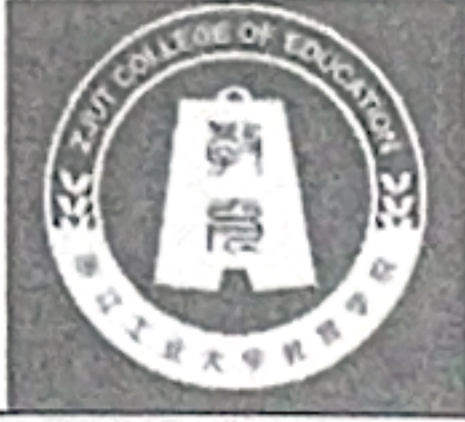

浙江工业大学教育学院伦理审查委员会

浙江工业大学教育学院伦理审查委员会批准函

Approval Letter of Ethics Review Committee

批准号：2026042101

经专家审查并经浙江工业大学教育学院伦理审查委员会讨论，兹批准 何梦瑶 老师 How AI Tools Usage Affects Chinese Students' Key Competencies for Sustainability in Higher Education Context: PLS-SEM and fsQCA Method (研究名称) 实验伦理申请，于2026年4月21日生效。

以下情况需提交伦理审查委员会进行再次审查：

- 1、对批准的研究方案、知情同意书等申请材料的任何修改或研究者更换；
- 2、暂停/终止该研究。

主任（签字）

（盖章）

日期：

2026.4.21

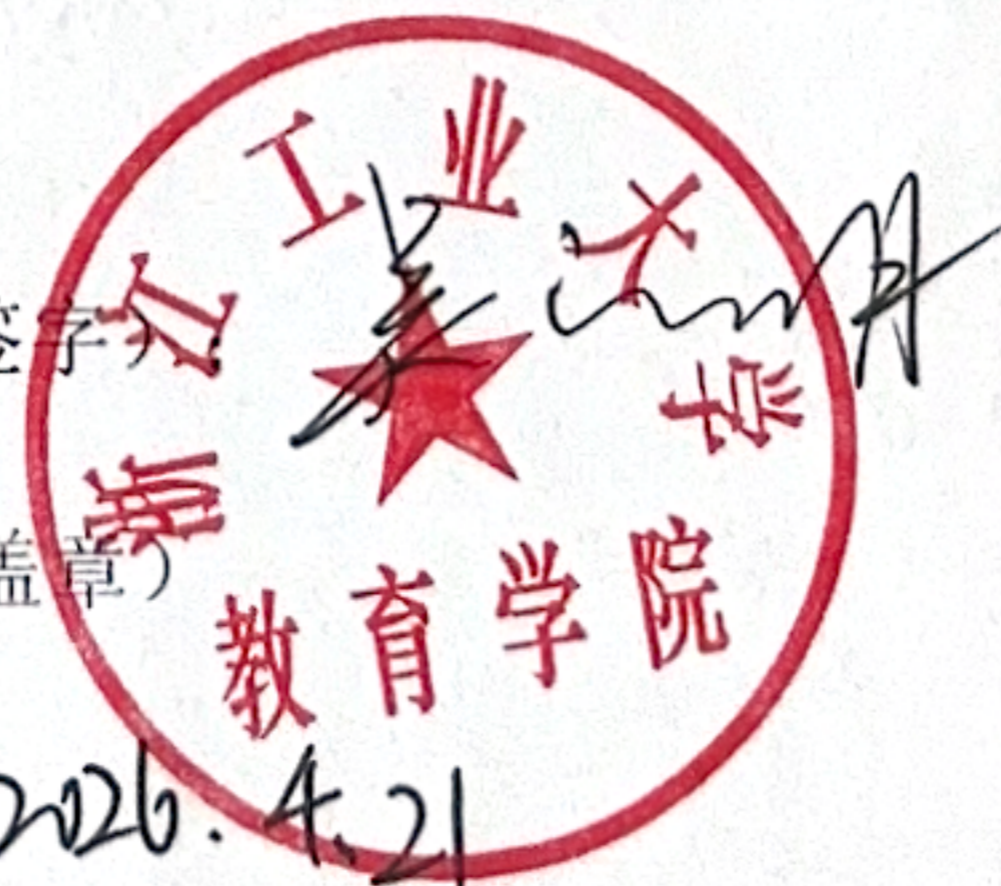

Supplement: Supplementary file 1 [file 2f4d8eb714a1cadf48d5dd84.pdf]
