# Supplementary material
Source: Research Square preprint supplement (doi:10.21203/rs.3.rs-9169805/v1)
Supplement: Supplementary file 2 [file b67d8daa5862b74331e00e0c.pdf]

## 问卷

亲爱的同学们，在你使用人工智能（AI）辅助学习的经历中，你有什么样的感受呢？对你的可持续发展能力有什么样的影响呢？以下问题是为了探究 AI 辅助学习对你的可持续发展能力的影响。（可持续发展能力：系统思维能力，预见思维能力，规范思维能力，战略思维能力，协作能力，批判思维能力，自我意识能力，综合解决问题能力）。

学院：\_\_\_\_\_ 专业：\_\_\_\_\_ 年级：\_\_\_\_\_ 性别：\_\_\_\_\_ 年龄：\_\_\_\_\_

1. 学习中使用的人工智能工具符合我的个人兴趣。  
非常同意 同意 中立 不同意 非常不同意
2. 学习中使用的人工智能工具根据我的喜好提供个性化服务。  
非常同意 同意 中立 不同意 非常不同意
3. 人工智能工具为我提供了专属的学习路径或选项。  
非常同意 同意 中立 不同意 非常不同意
4. 学习中使用的人工智能工具符合我的需求。  
非常同意 同意 中立 不同意 非常不同意
5. 对我的学习有影响的人认为我应该在學習中使用人工智能工具。  
非常同意 同意 中立 不同意 非常不同意
6. 我重视意见的人鼓励我在學習中使用人工智能工具。  
非常同意 同意 中立 不同意 非常不同意
7. 对我来说重要的人支持我在學習中使用人工智能工具。  
非常同意 同意 中立 不同意 非常不同意
8. 在我的學習中，人工智能工具的使用很频繁  
非常同意 同意 中立 不同意 非常不同意
9. 人工智能工具的使用与我的學習是相关的。  
非常同意 同意 中立 不同意 非常不同意
10. 在我的學習中，人工智能工具的使用很重要。  
非常同意 同意 中立 不同意 非常不同意
11. 我发现人工智能工具使用起来非常方便。  
非常同意 同意 中立 不同意 非常不同意
12. 我发现人工智能工具提供的内容很容易理解。  
非常同意 同意 中立 不同意 非常不同意
13. 我发现学习如何使用人工智能工具很容易。  
非常同意 同意 中立 不同意 非常不同意
14. 我发现人工智能工具可以灵活地与我的學習进行交互。  
非常同意 同意 中立 不同意 非常不同意
15. 我认为人工智能工具让我的學習变得容易。  
非常同意 同意 中立 不同意 非常不同意
16. 我认为人工智能工具可以帮助我更有效地學習。  
非常同意 同意 中立 不同意 非常不同意
17. 我发现人工智能工具对完成我的學習任务很有用。  
非常同意 同意 中立 不同意 非常不同意
18. 我认为人工智能工具可以帮助我提高學習质量。

- 非常同意 同意 中立 不同意 非常不同意
19. 我愿意花费时间和精力来学习如何更好地使用人工智能工具。  
非常同意 同意 中立 不同意 非常不同意
20. 我计划将来使用人工智能工具来满足我的学习需求。  
非常同意 同意 中立 不同意 非常不同意
21. 我希望将来经常使用人工智能工具进行学习。  
非常同意 同意 中立 不同意 非常不同意
22. 我认为使用人工智能工具来辅助学习是有必要的。  
非常同意 同意 中立 不同意 非常不同意
23. 我依靠人工智能工具来帮助我完成各种任务。  
非常同意 同意 中立 不同意 非常不同意
24. 我投入了时间和精力来了解和使用人工智能工具。  
非常同意 同意 中立 不同意 非常不同意
25. 我不断探索新的人工智能工具，并将它们融入到完成各种任务中。  
非常同意 同意 中立 不同意 非常不同意
26. 人工智能工具帮助我更好地与他人合作学习。  
非常同意 同意 中立 不同意 非常不同意
27. 人工智能工具让我更加意识到自己对社会和环境的责任。  
非常同意 同意 中立 不同意 非常不同意
28. 人工智能工具提高了我整合不同观点以解决复杂可持续发展问题的能力。  
非常同意 同意 中立 不同意 非常不同意

| Variables | Items | Questions                                                                                                        | References                                        |
|-----------|-------|------------------------------------------------------------------------------------------------------------------|---------------------------------------------------|
| PP        | PP1   | The AI tools used in learning match my personal interests.                                                       | Sheng et al. (2008);                              |
|           | PP2   | The AI tools used in learning offer personalized services based on my preferences.                               | Higgins et al. (2018)                             |
|           | PP3   | The AI tools offer customized learning paths or options for me.                                                  |                                                   |
|           | PP4   | The AI tools used in learning match my needs.                                                                    |                                                   |
| SN        | SN1   | People who influenced my study think I should use AI tools in learning.                                          | Teo and Van Schalk (2009)                         |
|           | SN2   | People whose opinions I value encourage me to use AI tools in learning.                                          |                                                   |
|           | SN3   | People who are important to me support me to use AI tools in learning.                                           |                                                   |
| LR        | LR1   | In my learning, use of AI tools is frequent                                                                      | To and Tang (2019)                                |
|           | LR2   | In my learning, usage of AI tools is relevant.                                                                   |                                                   |
|           | LR3   | In my learning, use of AI tools is important.                                                                    |                                                   |
| PEOU      | PEOU1 | I find it easy to access AI tools.                                                                               | Fan and Wang, (2023);                             |
|           | PEOU2 | I find it easy to learn how to use AI tools.                                                                     | Falebita and Kok, (2025)                          |
|           | PEOU3 | I find it easy to understand the content provided by AI tools.                                                   |                                                   |
|           | PEOU4 | I find AI tools to be flexible to interact with.                                                                 |                                                   |
| PU        | PU1   | I think AI tools make my learning easy.                                                                          | Fan and Wang, (2023);                             |
|           | PU2   | I think AI tools can assist me in learning more efficiently.                                                     | Falebita and Kok, (2025)                          |
|           | PU3   | I find AI tools useful in my learning tasks.                                                                     |                                                   |
|           | PU4   | I think AI tools can help me improve the quality of my learning.                                                 |                                                   |
| BIU       | BIU1  | I am willing to spend time and effort to learn how to use AI tools better.                                       | Fan and Wang, (2023);<br>Falebita and Kok, (2025) |
|           | BIU2  | I plan to use AI tools for my learning needs in the future.                                                      |                                                   |
|           | BIU3  | I expect to use AI tools frequently in the future for learning purposes.                                         |                                                   |
|           | BIU4  | I think it is necessary to use AI tools in assisting learning.                                                   |                                                   |
| AU        | AU1   | I rely on AI tools to help me complete a variety of tasks.                                                       | Fan and Wang, (2023);                             |
|           | AU2   | I invest time and effort in learning and using AI tools.                                                         | Falebita and Kok, (2025)                          |
|           | AU3   | I am constantly exploring new AI tools and incorporating them in completing various tasks.                       |                                                   |
| KCS       | KCS1  | AI tools help me better collaborate with others in learning.                                                     | Liu and Ma (2024);                                |
|           | KCS2  | Using AI tools improves my ability to integrate different perspectives to solve complex sustainability problems. | UNESCO (2017)                                     |
|           | KCS3  | Using AI tools in learning makes me more aware of my responsibilities to society and the environment.            |                                                   |
